# Supplementary figures and images for: Histone deposition pathways determine the chromatin landscapes of H3.1 and H3.3 K27M oncohistones
Source: eLife journal article supplement (doi:10.7554/elife.61090), 2020-09-09

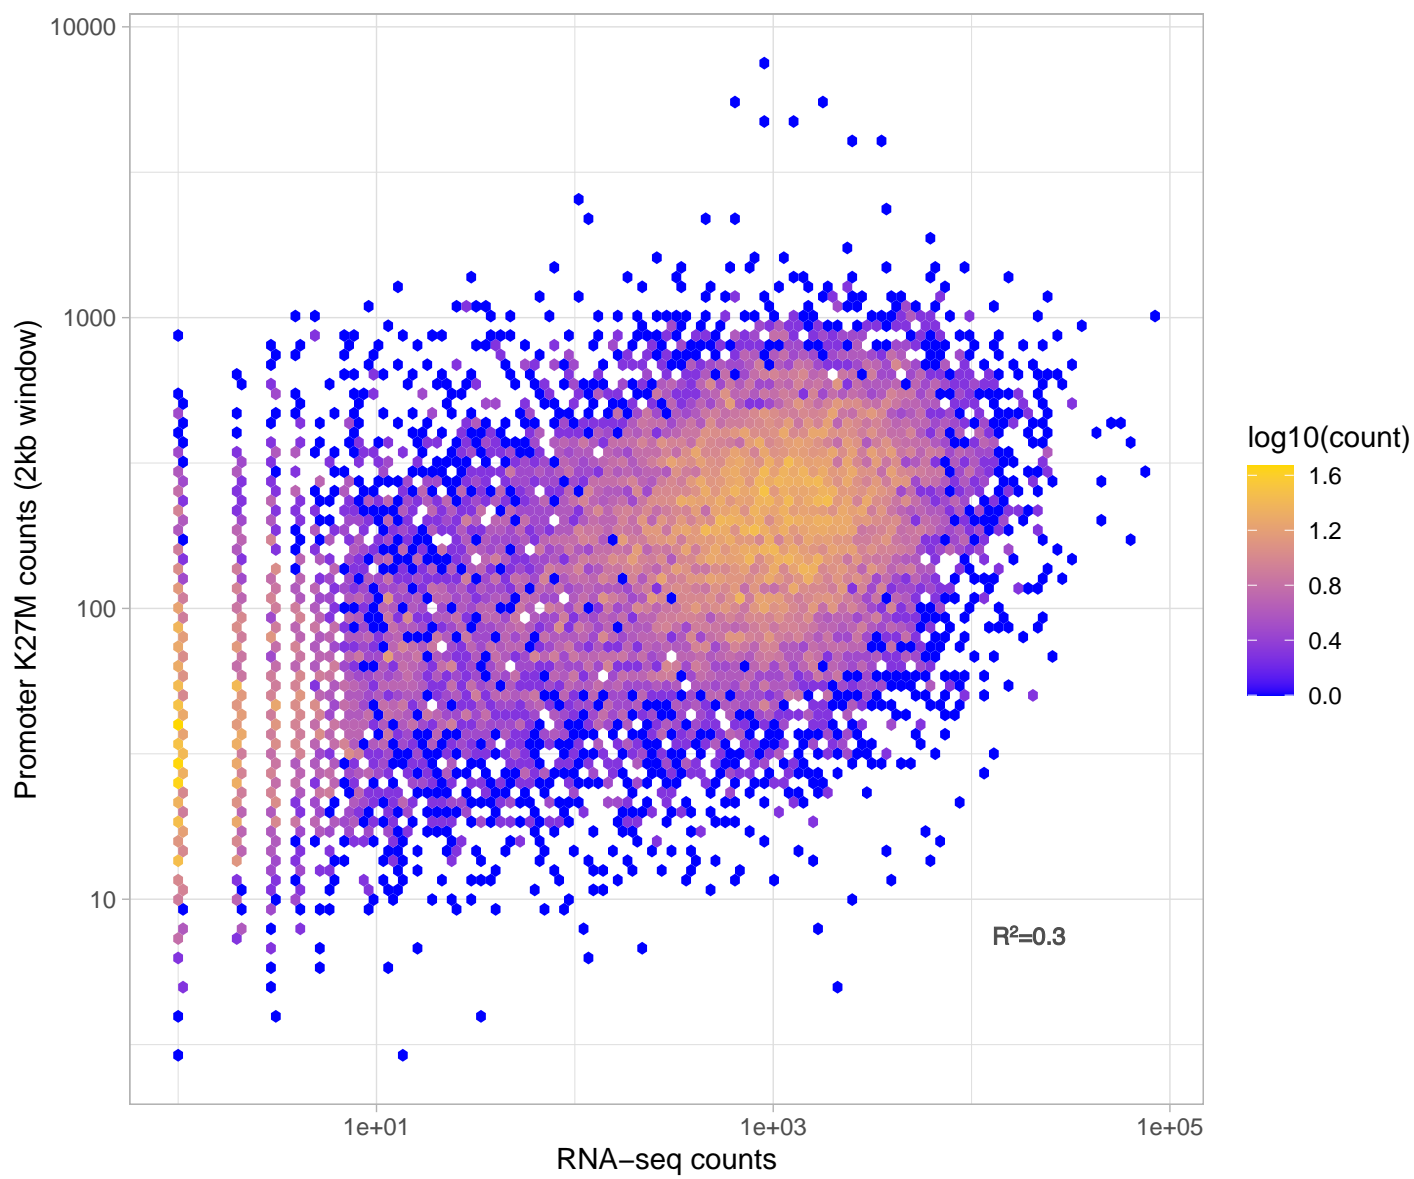

Supplement: supp [file elife-61090-supp-v1.zip]
